# Supplementary material for: Nitrogen-doped carbon foam as an efficient enzymatic biosensing platform for glucose sensing
Source: Royal Society of Chemistry journal article supplement (doi:10.1039/c6ay01265e), 2016-01-01
Supplement: c6ay01265e1.pdf [file c6ay01265e1.pdf]

## Supplementary Information

# Nitrogen-Doped Carbon Foam as an Efficient Enzymatic Biosensing Platform for Glucose Sensing

Yonggui Song<sup>1,2</sup>, Dan Su<sup>2</sup>, Yuan Shen<sup>1</sup>, Coucong Gong<sup>1</sup>, Yonghai Song<sup>1</sup>, and Li Wang<sup>1,\*</sup>

*<sup>1</sup>Key Laboratory of Functional Small Organic Molecule, Ministry of Education, Key Laboratory of Chemical Biology, Jiangxi Province, College of Chemistry and Chemical Engineering, Jiangxi Normal University, Nanchang 330022, China.*

*<sup>2</sup>Jiangxi University of Chinese Traditional Medicine, 56 Yangming Road, Nanchang 330006, China.*

---

\*Corresponding author: Tel/Fax: +86 791 88120861. E-mail: lwanggroup@aliyun.com (L. Wang).

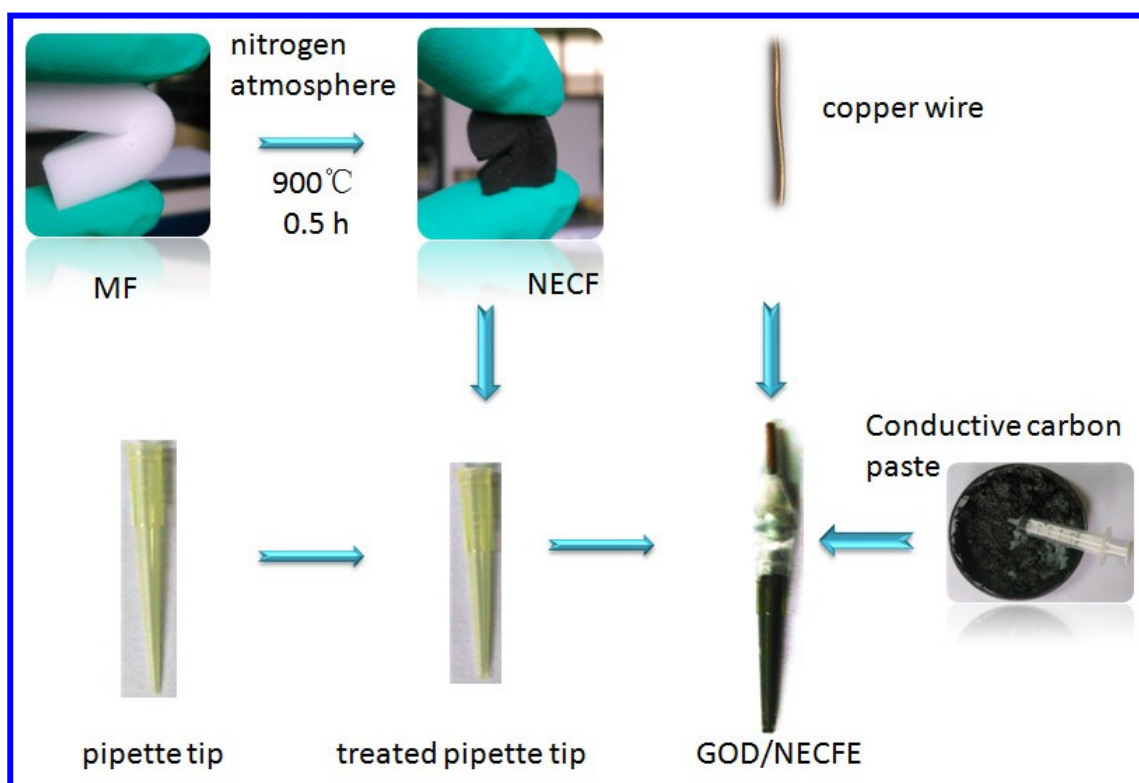

**Fig. S1.** Schematic illustration of the fabrication of the integrated GOD/NECFE.

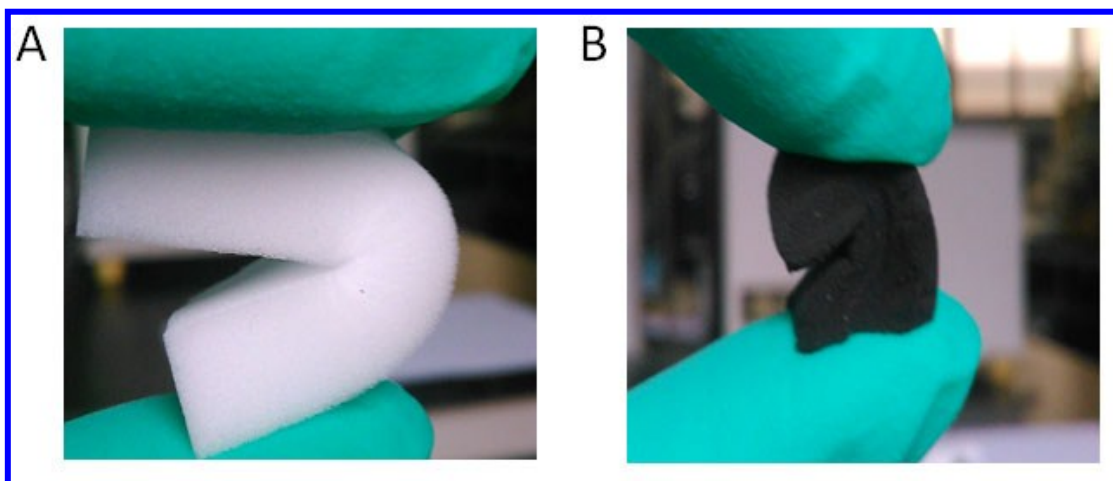

**Fig. S2.** Melamine foam and NECF bent by finger tips.

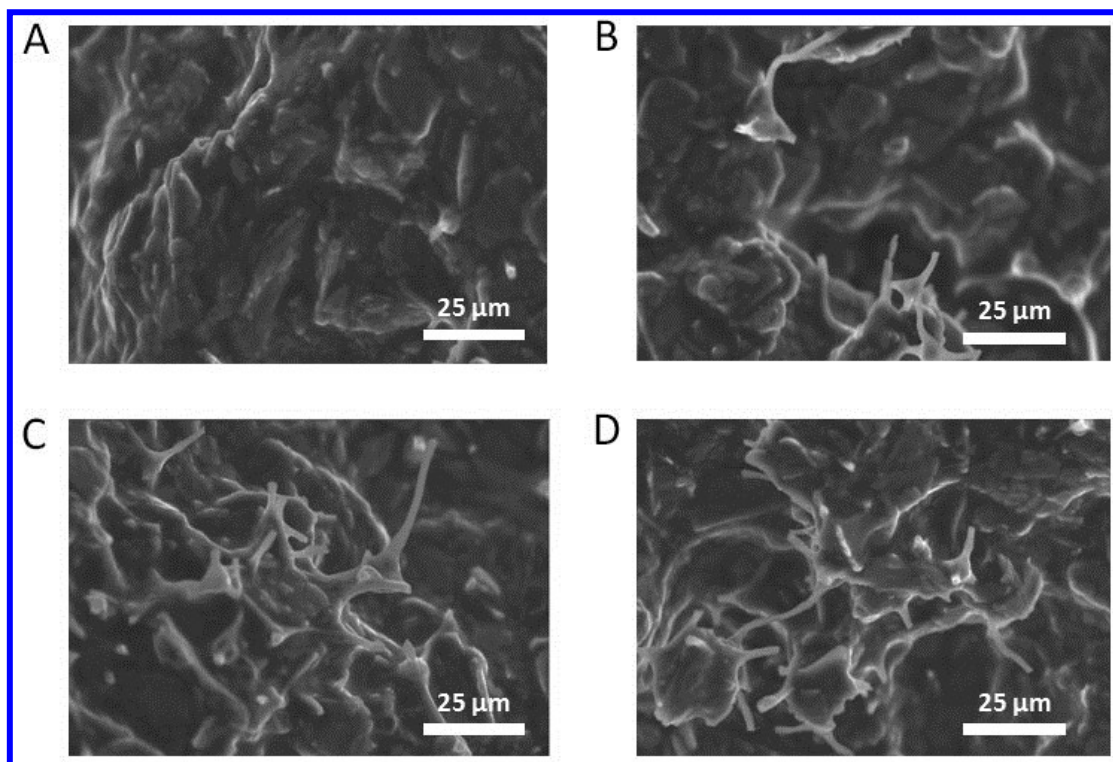

**Fig. S3.** SEM images of the GOD/NECFE prepared by different concentration of GOD solution used to construct the biosensor (A) 15 mg mL<sup>-1</sup> GOD solution (B) 12.5 mg mL<sup>-1</sup> GOD solution (C) 10 mg mL<sup>-1</sup> GOD solution (D) 7.5 mg mL<sup>-1</sup> GOD solution.

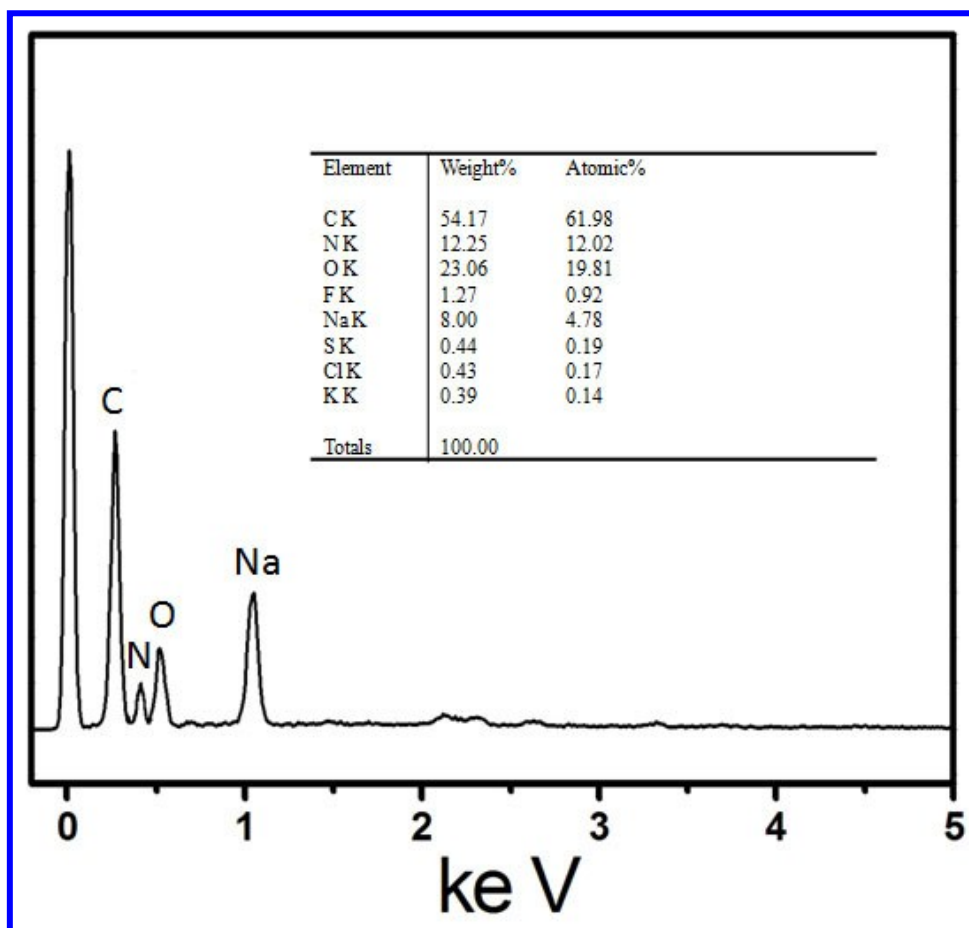

Fig. S4. EDS curve of NECFs.

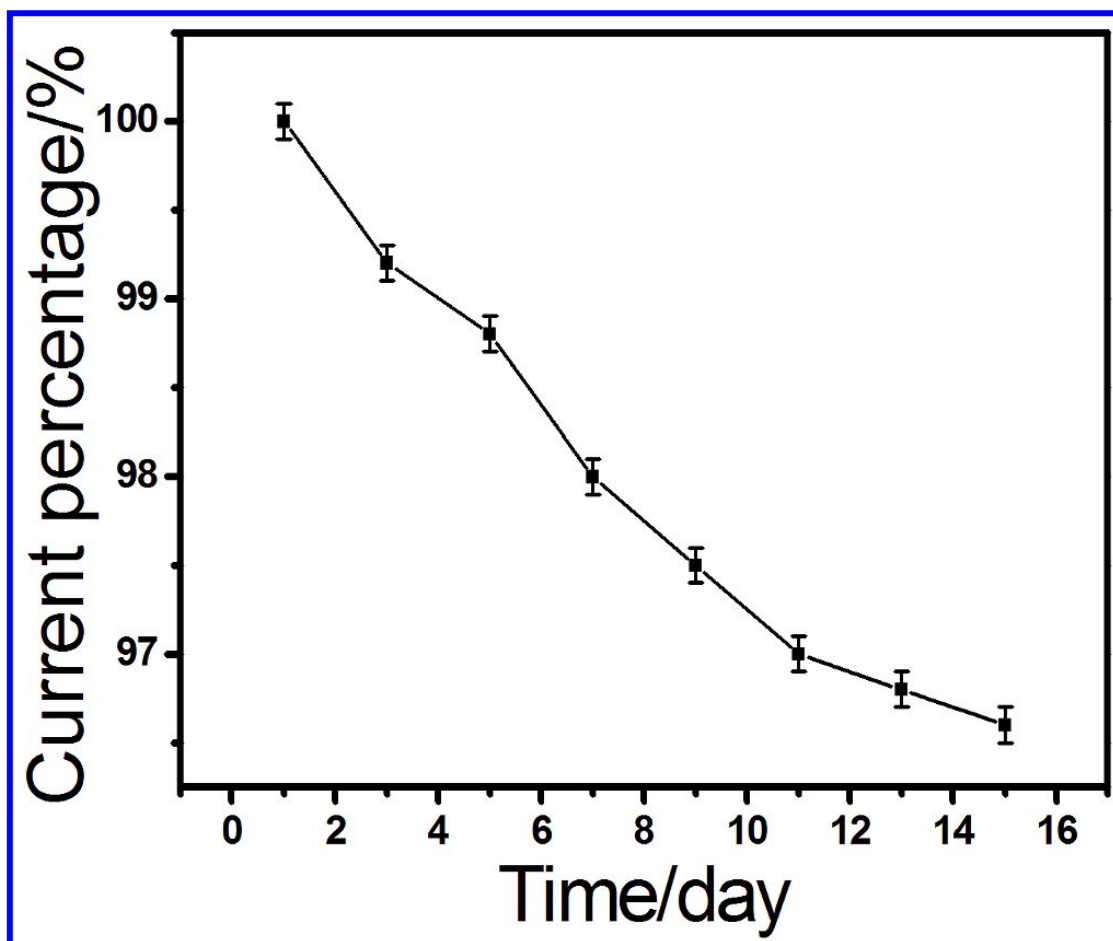

Fig. S5. Stability test of the GOD/NECFE in determination of 2.0 mM glucose in 15 days.

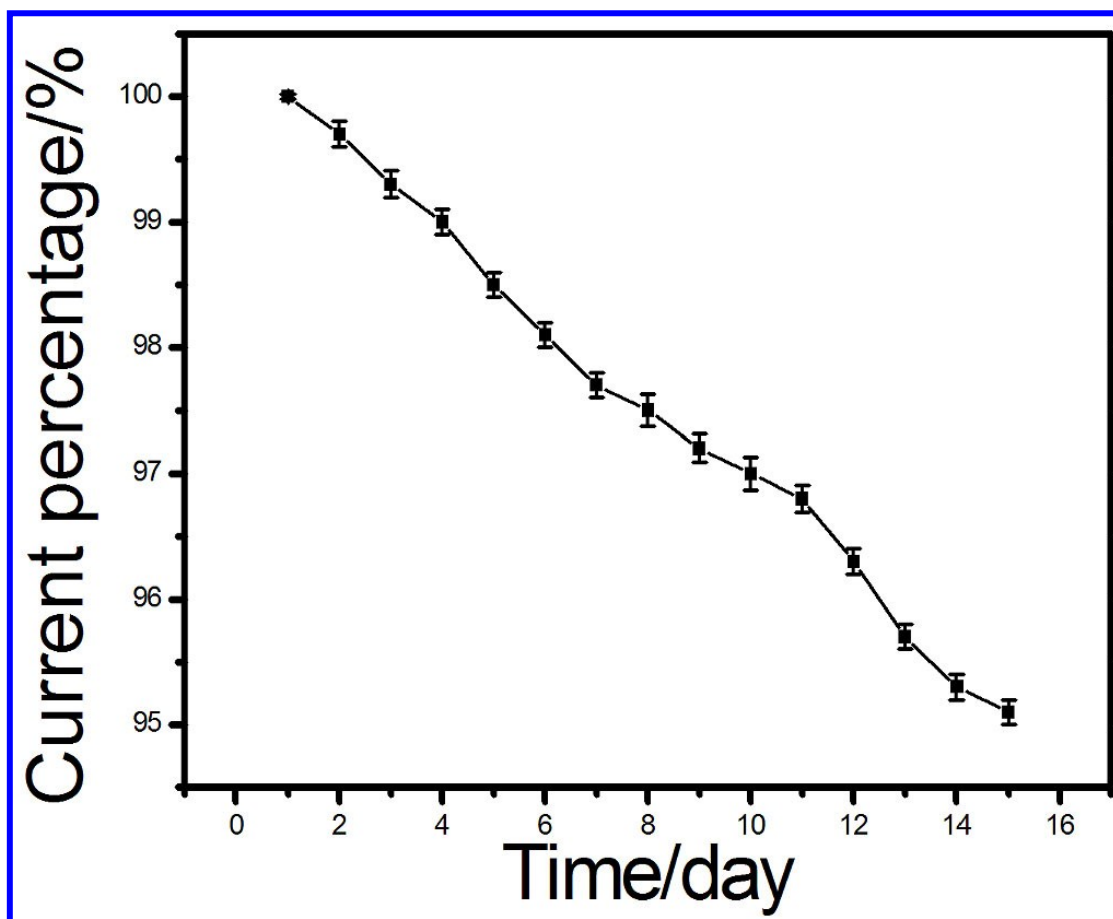

**Fig. S6.** Stability test of the GOD/NECFE in the determination of glucose in blood.

**Table S1.** Determination of glucose in blood serum sample.

| Blood serum sample (mM) | Diluted samples (mM) | Added (mM) | Determined by colorimetric enzymatic method (mM) | Determined by GOD/NECF biosensor (mM) | Recovery (%) | RSD (% ,n=5) |
|-------------------------|----------------------|------------|--------------------------------------------------|---------------------------------------|--------------|--------------|
|                         | 1.91                 | 1.00       | 2.88                                             | 2.93                                  | 100.69       | 3.02         |
| 9.18                    | 4.65                 | 1.00       | 5.62                                             | 5.71                                  | 101.06       | 3.17         |
|                         | 9.29                 | 1.00       | 10.33                                            | 10.21                                 | 99.22        | 3.19         |
